# Supplementary material for: Comparison of quantitative trait loci methods: Total expression and allelic imbalance method in brain RNA-seq
Source: PubMed Central journal article supplement (PMC6576752; doi:10.1371/journal.pone.0217765), 2019-06-17
Supplement: pone.0217765.s001.pdf [file pone.0217765.s001.pdf]

# Allelic Imbalance in SZ (Supplemental Material 1)

This is a document containing supplemental figures and tables for the “Comparison of Quantitative Trait Loci Methods: Total Expression and Allelic Imbalance Method in Brain RNA-seq” manuscript.

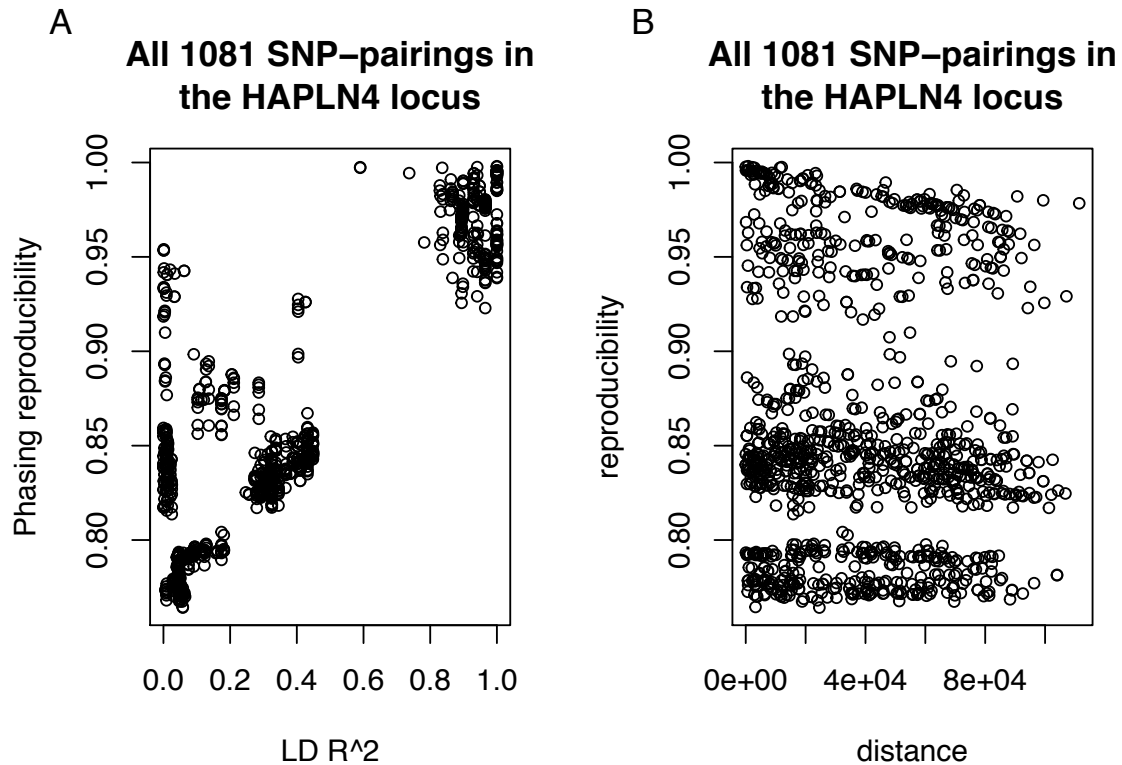

Fig S1-1: Illustration of the phasing quality of SNPs in the HAPLN4 region. All risk-SNP regions were phased using the Shapeit2 tool in order to link risk-SNPs with txSNPs. The fundamental mechanism of phasing is to determine likely parent of origin for all txSNPs that are heterozygous, by assigning alleles as being either of parent 1 (P1) origin or parent 2 (P2) origin. According to Shapeit2 notation, this is denoted with a vertical bar |, such that for example an A/G heterozygous SNP can be either A|G or G|A, meaning that the A-allele was inherited from the parent 1 or the parent 2, respectively.

A default execution of Shapeit2 provides one guess of likely haplotype, so the degree of probability is not directly available. However, as suggested by Shapeit2 authors a probability can be calculated by iterating through the same phasing using different random seeds. The phasing reproducibility between any two SNPs is then defined as the fraction of iterations where the two SNPs have the same results with different random seeds; a value of 1 indicates perfect reproducibility and 0.5 indicates random choice.

We used this approach to investigate the relation between reproducibility and linkage disequilibrium (LD) R<sup>2</sup>, as well as between reproducibility and distance. This is illustrated here for all pairwise combinations of SNPs in the HAPLN4 region. For A) reproducibility and LD, we unsurprisingly found that all SNP-pairs in perfect LD (R<sup>2</sup>=1) achieve almost completely perfect phasing reproducibility. However, importantly SNP-pairs that are not in LD (R<sup>2</sup>=0) also can achieve reproducibility-values above 0.9. Moreover, in this region no SNP-pair had worse reproducibility than 0.78. For B) reproducibility and distance, we found that at the investigated distance (400KB) there was only a weak tendency towards diminished phasing reproducibility with distance.

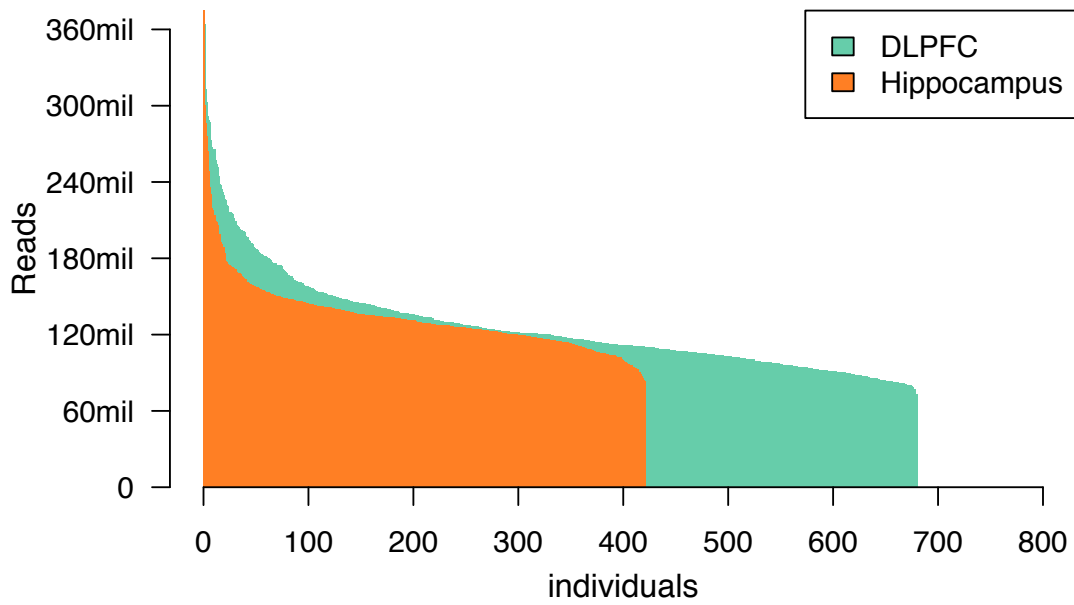

Fig S1-2: Pair-end reads in each fastq file for respective individual

|      | DLPFC     | Hippocampus | Both      |
|------|-----------|-------------|-----------|
| Mean | 127133556 | 134174615   | 129825914 |
| SD   | 39665006  | 30281344    | 36510189  |

Table S1-1: mean and standard deviation values for read counts in fastq files

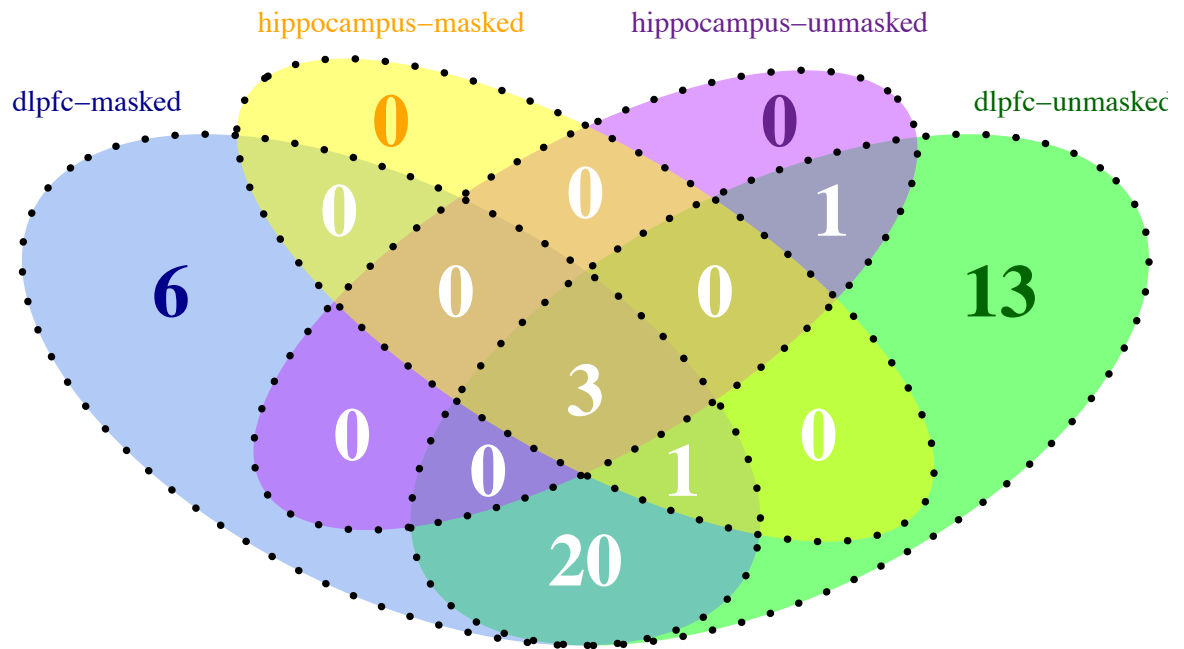

Fig S1-3: The number of aeQTLs found in respective tissue and alignment using significance thresholds set according to FDR5% as in main text table 1

|                      | mean  | sd    | txSNPs |
|----------------------|-------|-------|--------|
| dlpfc.masked         | 0.506 | 0.127 | 247978 |
| dlpfc.unmasked       | 0.517 | 0.125 | 239262 |
| hippocampus.masked   | 0.505 | 0.161 | 137116 |
| hippocampus.unmasked | 0.513 | 0.160 | 135948 |

Table S1-2: A table of reference frequency and number of txSNPs in all genes and samples used for the calculation

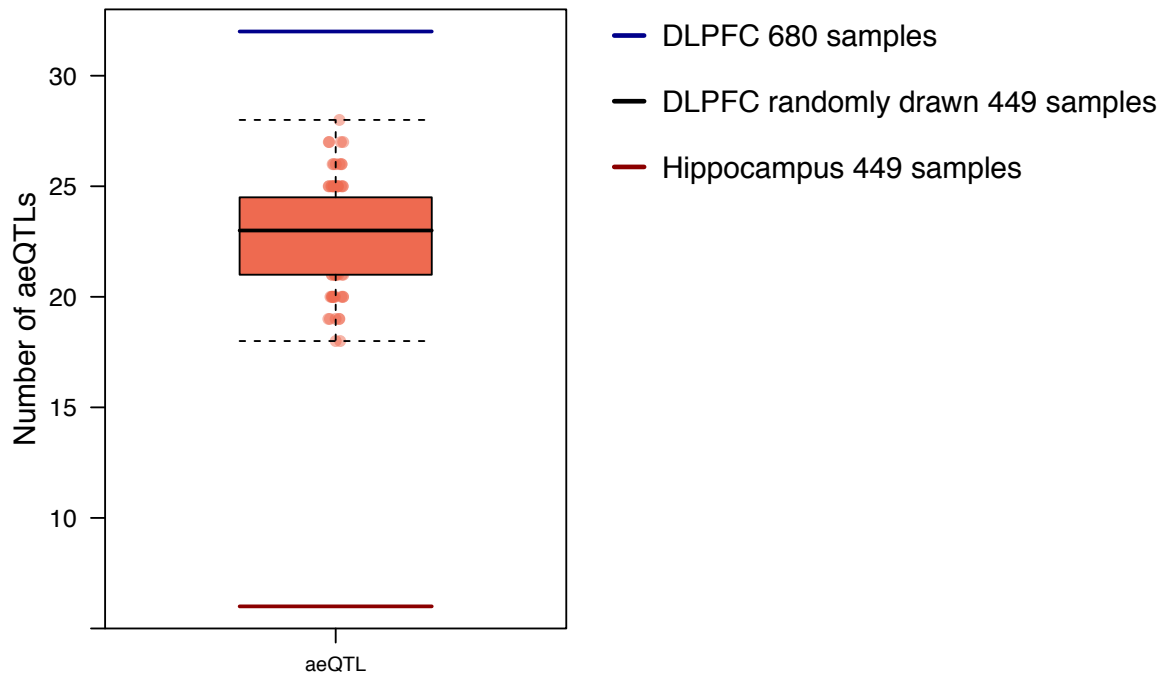

Fig S1-4: Figure demonstrating the amount of aeQTLs found for DLPFC(n=680) using the same sample size as Hippocampus(n=449). The DLPFC dataset was downsampled down to 449 and investigated for aeQTLs 100 times.

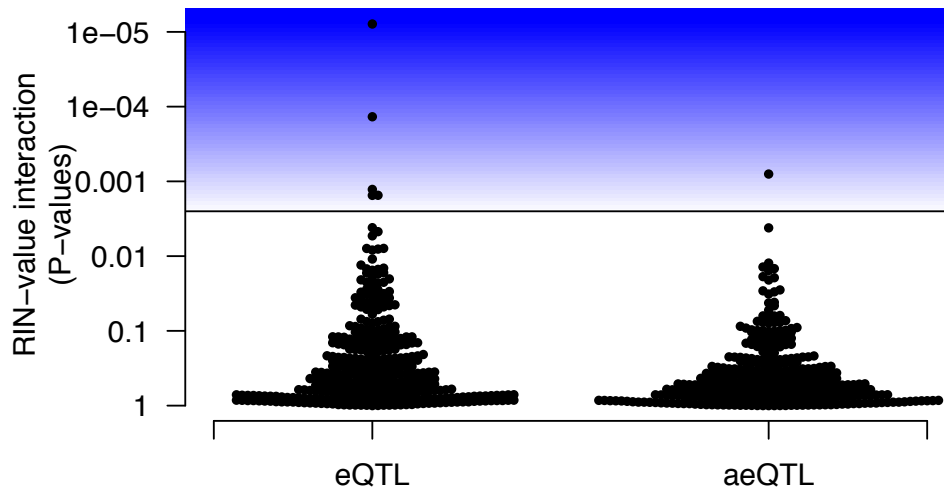

Fig S1-5: Calculation of RIN-interaction values for eQTL and aeQTL. Each dot shows the interaction P-value for all SNP-gene pairs. A binary RIN value cutoff was set at RIN 8. For the eQTL analysis 5 pairs were significant after multiple testing correction, in aeQTL analysis 1 pair was significant ( $P < 0.0025$ ).

LRRN3 – rs13240464

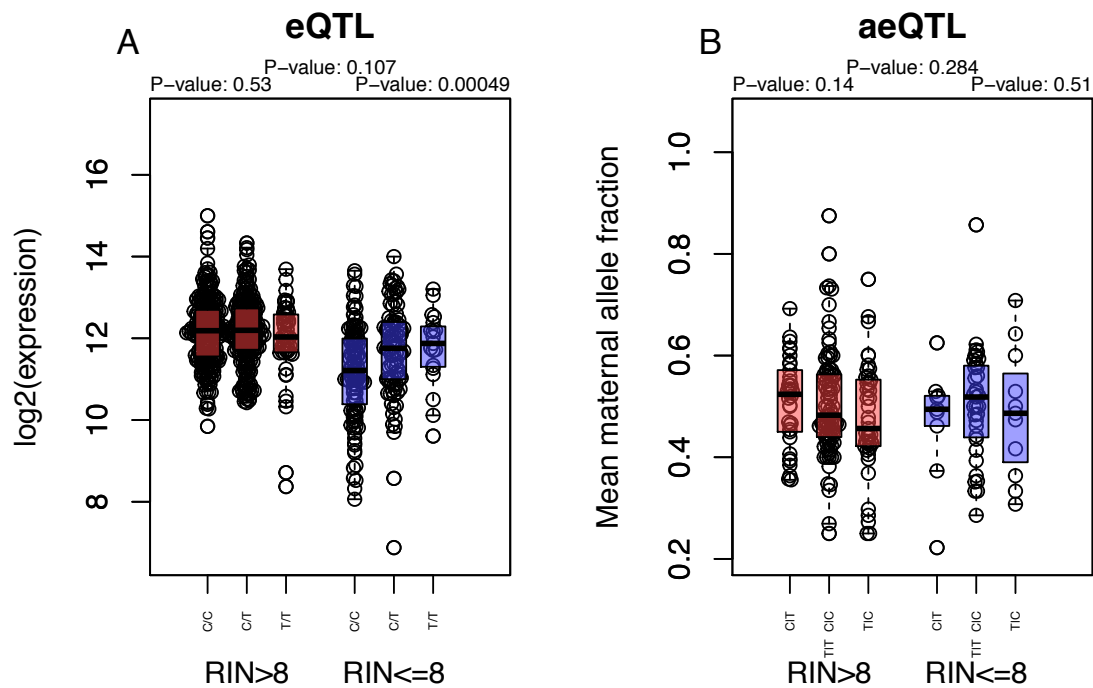

Fig S1-6: The eQTL for LRRN3 and risk-SNP rs13240464, stratified by RIN value. This plot illustrates an eQTL with potential interaction effects caused by RNA-degradation: when testing eQTL effect A), there was a significant interaction between RIN-value and risk-SNP genotype ( $P_{\text{interaction}}=1.36e-04$ ), with lower RIN values giving rise to a stronger eQTL effect. B) This was not the case for aeQTL ( $P_{\text{interaction}}=0.37$ ). Neither the non-stratified by RIN, but RIN-corrected eQTL ( $P=0.107$ ) nor the aeQTL ( $P=0.284$ ) for this gene-SNP pair were significant after multiple testing



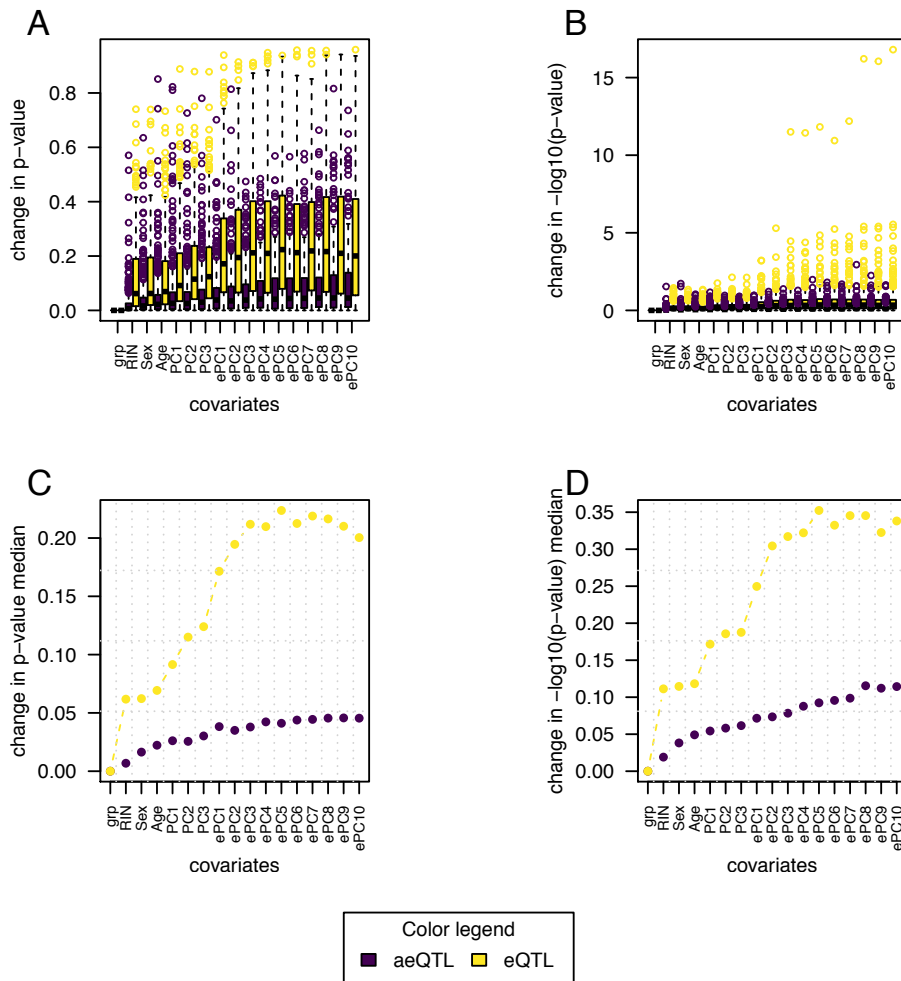

Fig S1-7: Covariates impact on p-values in aeQTL versus eQTL. All testable 371 gene-snp pairs in DLPFC have been included in this analysis, comparing the change of p-value distributions of aeQTL (purple) and eQTL (yellow). For each step to the right on the x-axis one more covariate is added, indicated as x-axis labels. For example, the third point's p-value was calculated using the formula  $\text{expr} \sim \text{grp} + \text{RIN} + \text{Sex}$ . A) Changes in raw p-value, calculated by  $|\text{pvalue1} - \text{pvalue0}|$ , giving more effect of p-values in the higher p-value range. B) Performing the same comparison, but starting with p-values which had been  $-\log_{10}$  transformed, to give more effect on changes in the lower range of p-values. Taking the median from each p-value change using C) raw p-value and D)  $-\log_{10}$  p-value, the pattern for both variants are very similar, indicating a similar effect of each additional covariate on the whole p-value range. In general, the aeQTL analysis shows little impact of covariate usage compared to eQTL analysis.

| Gene      | RiskSNP         | Pos            | Dist (Kb) | Ref/Alt | acQTL (est) | acQTL (pval) | acQTL (pval) | acQTL (pval) | acQTL (pval) | rsSNP          | Reads | Genegroup   |
|-----------|-----------------|----------------|-----------|---------|-------------|--------------|--------------|--------------|--------------|----------------|-------|-------------|
| ALKBH5    | rs8029200       | chr17:18       | -154      | G/A     | 4.1e-05     | -0.027       | 0.99         | 0.00998      | 0.00998      | rs13284        | 110   | 57/116/54   |
| ALKBH5    | rs8029290       | chr17:18       | -153      | G/A     | 4.1e-05     | 0.031        | 0.99         | 0.002        | 0.002        | rs1565371      | 84    | 57/116/54   |
| BAG5      | rs7267548       | chr20:48       | -119      | C/T     | 0.16        | 0.1          | 0.0076       | 0.0023       | 0.0023       | rs75023        | 18    | 10/16/4     |
| BAG5      | rs12887734      | chr14:104      | 23        | C/T     | 0.029       | 0.046        | 0.0048       | 3.8e-07      | 3.8e-07      | rs7695         | 110   | 50/158/49   |
| CDIPT     | rs12691307      | chr16:30       | 66        | A/G     | -0.029      | -0.039       | 0.027        | 5.9e-05      | 5.9e-05      | rs115410970    | 19    | 10/20/14    |
| CNNM2     | rs11191419      | chr10:105      | -202      | T/A     | -0.0084     | -0.036       | 0.26         | 5.0e-01      | 5.0e-01      | rs2275271      | 87    | 112/55/114  |
| CNNM2     | rs9420          | chr11:58       | -75       | A/G     | -0.007      | -0.024       | 0.13         | 3.9e-07      | 3.9e-07      | rs708228       | 140   | 101/14/127  |
| CNNM2     | rs9420          | chr11:58       | -76       | A/G     | -0.007      | -0.024       | 0.13         | 3.9e-07      | 3.9e-07      | rs200470100    | 12    | 77/29/16    |
| CNNM2     | rs9420          | chr11:58       | -54       | A/G     | 0.036       | -0.032       | 0.13         | 0.0024       | 0.0024       | rs10896644     | 34    | 62/115/68   |
| CYP2D6    | rs602055        | chr22:43       | 78        | C/T     | 0.036       | 0.13         | 0.035        | 0.00075      | 0.00075      | rs28371704     | 34    | 22/25/16    |
| DFA5      | chr7_24747494_D | chr7:25        | -11       | I/D     | -0.028      | -0.058       | 0.0097       | 0.0027       | 0.0027       | rs7891420      | 1900  | 50/206/21   |
| DFA5      | rs605094        | chr20:37       | -168      | A/G     | 0.014       | 0.16         | 0.32         | 0.0013       | 0.0013       | rs36053162     | 8.7   | 7/10/8      |
| DFA5      | rs6704768       | chr2:234       | -120      | G/A     | -0.015      | -0.085       | 0.028        | 9.2e-08      | 9.2e-08      | rs12328151     | 300   | 52/64/53    |
| GIGYP2    | rs12325245      | chr16:59       | -60       | A/T     | -0.036      | -0.034       | 0.55         | 5.9e-06      | 5.9e-06      | rs6993         | 310   | 45/221/44   |
| HSPA9     | rs3849046       | chr5:138       | -51       | C/T     | 0.0087      | 0.018        | 0.72         | 7e-07        | 7e-07        | rs1042665      | 4900  | 86/74/75    |
| HSPA9     | SNORD63         | chr5:138       | -40       | C/T     | 0.0087      | -0.043       | 0.72         | 2.5e-06      | 2.5e-06      | rs11032        | 67    | 10/17/11    |
| HSPA9     | SNORD63         | chr5:138       | -190      | C/T     | 0.005       | 0.017        | 0.85         | 0.00092      | 0.00092      | rs1042665      | 4900  | 51/143/41   |
| HSPA9     | SNORD63         | chr16:68       | 205       | G/A     | 0.033       | 0.035        | 0.00039      | 0.026        | 0.026        | rs11542821     | 18    | 34/41/40    |
| HSPA9     | SNORD63         | chr16:68       | 212       | G/A     | 0.033       | 0.036        | 0.00039      | 0.066        | 0.066        | rs1109166      | 3.1   | 15/21/15    |
| HSPA9     | SNORD63         | chr16:68       | 212       | G/A     | 0.033       | 0.052        | 0.00039      | 0.3          | 0.3          | rs11860141     | 2.9   | 8/7/13      |
| HSPA9     | SNORD63         | chr16:68       | 210       | G/A     | 0.033       | -0.13        | 0.00039      | 0.42         | 0.42         | rs11860115     | 1.3   | 7/5/8       |
| HSPA9     | SNORD63         | chr16:68       | 210       | G/A     | 0.033       | -0.025       | 0.00039      | 0.59         | 0.59         | rs17851876     | 8.2   | 5/38/4      |
| HSPA9     | SNORD63         | chr16:68       | 208       | G/A     | 0.033       | -0.0011      | 0.00039      | 0.96         | 0.96         | rs11860125     | 7.1   | 31/31/23    |
| HSPA9     | SNORD63         | chr22:42       | -14       | T/C     | -0.013      | -0.076       | 0.082        | 1e-05        | 1e-05        | rs62240997     | 120   | 49/151/46   |
| LINC00634 | rs1023500       | chr22:42       | -14       | T/C     | -0.013      | -0.076       | 0.082        | 0.0021       | 0.0021       | rs62240998     | 150   | 46/150/60   |
| LINC00634 | chr7_2025096_I  | chr7:2         | 45        | D/I     | 0.04        | 0.33         | 0.0011       | 0.0011       | 0.0011       | rs10950456     | 41    | 96/22/92    |
| LINC00634 | chr7_2025096_I  | chr7:2         | 45        | D/I     | -0.0071     | -0.041       | 0.33         | 0.0025       | 0.0025       | rs11557347     | 42    | 86/28/83    |
| LINC00634 | rs4702          | chr15:91       | -37       | G/A     | 0.0045      | 0.017        | 0.3          | 0.0029       | 0.0029       | rs4773         | 180   | 73/156/70   |
| MA2       | rs2905426       | chr19:19       | 11        | G/T     | -0.0078     | -0.037       | 0.078        | 0.0022       | 0.0022       | rs756997       | 29    | 51/71/49    |
| MA2       | rs2905426       | chr19:19       | 11        | G/T     | 0.014       | 0.028        | 0.13         | 8.1e-05      | 8.1e-05      | rs1064395      | 130   | 64/98/65    |
| MA2       | rs2905426       | chr19:19       | 132       | G/T     | 0.014       | -0.05        | 0.13         | 2.5e-05      | 2.5e-05      | rs2228600      | 88    | 16/59/21    |
| MA2       | rs2905426       | chr19:19       | 132       | G/T     | 0.014       | -0.05        | 0.13         | 2.5e-05      | 2.5e-05      | rs17821543     | 1800  | 23/7/36     |
| MA2       | rs2905426       | chr22:43       | 122       | C/T     | -0.011      | -0.031       | 0.0083       | 2.8e-07      | 2.8e-07      | chr22_42481849 | 120   | 98/71/80    |
| MA2       | rs2905426       | chr22:43       | 122       | C/T     | -0.011      | -0.031       | 0.0083       | 2.4e-09      | 2.4e-09      | rs709937       | 1500  | 95/46/120   |
| MA2       | rs2905426       | chr22:43       | 122       | C/T     | -0.011      | -0.031       | 0.0083       | 4e-05        | 4e-05        | rs748002       | 1600  | 104/56/117  |
| MA2       | rs2905426       | chr20:19       | -90       | T/G     | -0.0059     | -0.018       | 0.023        | 1.7e-05      | 1.7e-05      | rs373525672    | 10    | 23/98/11    |
| MA2       | rs2905426       | chr15:41       | -16       | G/A     | 0.048       | 0.11         | 0.0032       | 0.0027       | 0.0027       | rs62021888     | 3     | 21/4/13     |
| MA2       | rs2905426       | chr15:41       | -16       | G/A     | -0.015      | -0.11        | 0.34         | 0.00027      | 0.00027      | rs21292804     | 23    | 30/14/25    |
| MA2       | rs2905426       | chr14:104      | -154      | G/T     | 0.036       | 0.035        | 6e-04        | 0.58         | 0.58         | rs10134157     | 40    | 8/48/6      |
| MA2       | rs2905426       | chr14:104      | -154      | G/T     | 0.036       | 0.035        | 6e-04        | 0.58         | 0.58         | rs45562136     | 31    | 11/27/8     |
| MA2       | rs2905426       | chr20:37       | -95       | A/G     | 0.029       | 0.058        | 0.51         | 0.0013       | 0.0013       | rs3743741      | 85    | 34/119/40   |
| MA2       | rs2905426       | chr16:68       | -156      | G/A     | -0.029      | -0.072       | 0.00081      | 0.005        | 0.005        | rs61733486     | 32    | 21/23/27    |
| MA2       | rs2905426       | chr16:68       | -156      | G/A     | -0.029      | -0.072       | 0.00081      | 0.005        | 0.005        | rs61746794     | 340   | 43/55/40    |
| MA2       | rs2905426       | chr16:68       | -198      | G/A     | -0.029      | -0.021       | 0.00081      | 0.095        | 0.095        | rs1131933      | 530   | 48/207/64   |
| MA2       | rs2905426       | chr16:68       | -200      | G/A     | -0.029      | -0.0082      | 0.00081      | 0.38         | 0.38         | rs1131933      | 530   | 48/207/64   |
| MA2       | rs2905426       | chr16:68       | -184      | G/A     | -0.029      | -0.0065      | 0.00081      | 0.96         | 0.96         | rs75567372     | 5.7   | 2/12/6      |
| MA2       | rs2905426       | chr16:68       | -184      | G/A     | -0.029      | -0.0065      | 0.00081      | NaN          | NaN          | rs138720818    | 2.9   | 3/5/5       |
| MA2       | rs2905426       | chr16:30       | 114       | A/G     | -0.029      | -0.087       | 0.3          | 0.00061      | 0.00061      | rs14436390     | 31    | 7/7/6       |
| MA2       | rs2905426       | chr12:57       | -186      | A/C     | -0.01       | 0.1          | 0.11         | 0.0017       | 0.0017       | rs77784795     | 56    | 7/13/8      |
| MA2       | rs2905426       | chr19:50       | 45        | T/G     | -0.025      | -0.075       | 0.088        | 1e-04        | 1e-04        | rs3187346      | 50    | 40/49/34    |
| MA2       | rs2905426       | chr5:138       | -70       | C/T     | -0.00031    | -0.0099      | 0.89         | 0.00086      | 0.00086      | rs1046576      | 470   | 109/118/117 |
| MA2       | rs2905426       | chr1_8424984_D | 12        | I/D     | -0.0048     | -0.04        | 0.15         | 2.9e-11      | 2.9e-11      | rs1064826      | 250   | 74/28/107   |
| MA2       | rs2905426       | chr1_8424984_D | 12        | I/D     | -0.0048     | -0.026       | 0.15         | 9.2e-08      | 9.2e-08      | rs8627         | 420   | 79/136/99   |
| MA2       | rs2905426       | chr1_8424984_D | 6         | I/D     | -0.0048     | 0.026        | 0.15         | 8.1e-05      | 8.1e-05      | rs11121172     | 240   | 87/22/121   |
| MA2       | rs2905426       | chr1_8424984_D | 6         | I/D     | -0.0048     | 0.021        | 0.15         | 0.0018       | 0.0018       | rs1058766      | 240   | 86/19/121   |
| MA2       | rs2905426       | chr1_8424984_D | 6         | I/D     | -0.0048     | -0.03        | 0.11         | 2.5e-05      | 2.5e-05      | rs7582536      | 43    | 120/3/104   |
| MA2       | rs2905426       | chr2:198       | -132      | G/A     | -0.021      | -0.051       | 0.07         | 0.0014       | 0.0014       | rs1755056      | 26    | 30/56/55    |
| MA2       | rs2905426       | chr19:50       | 92        | T/G     | -0.024      | -0.071       | 0.7          | 0.0014       | 0.0014       | rs10927011     | 26    | 64/136/48   |
| MA2       | rs2905426       | chr1:244       | -24       | A/G     | 0.015       | -0.059       | 0.033        | 5.3e-05      | 5.3e-05      | rs10927011     | 160   | 67/148/74   |
| MA2       | rs2905426       | rs12691307     | 29        | A/G     | 0.015       | -0.033       | 0.033        | 4e-04        | 4e-04        | rs11344        | 160   | 64/136/48   |
| MA2       | rs2905426       | rs4523957      | 23        | G/T     | 0.026       | 0.037        | 0.62         | 5.3e-06      | 5.3e-06      | rs749240       | 23    | 112/17/123  |
| MA2       | rs2905426       | chr17:2        | 6         | G/T     | 0.026       | -0.042       | 0.62         | 0.0012       | 0.0012       | rs1885987      | 27    | 53/82/68    |

| Gene                      | RisksNP          | Pos       | Dist (Kb) | Ref/Alt | aeQTL (est) | aeQTL txSNP (est) | aeQTL (pval) | aeQTL txSNP (pval) | Reads | Genomgroup (ind) |
|---------------------------|------------------|-----------|-----------|---------|-------------|-------------------|--------------|--------------------|-------|------------------|
| SOX2, SOX2-OT             | rs9831016        | chr3:181  | -291      | T/A     | -0.004      | 0.039             | 0.49         | 0.0017             | 610   | 39/188/49        |
| STAT6                     | rs324017         | chr12:57  | -2        | A/C     | 0.0074      | 0.11              | 0.25         | 8.8e-26            | 180   | 94/141/89        |
| STAT6                     | rs324017         | chr12:57  | -2        | A/C     | 0.0074      | -0.055            | 0.25         | 1e-13              | 54    | 104/18/108       |
| STAT6                     | rs324017         | chr12:57  | -2        | A/C     | 0.0074      | -0.032            | 0.25         | 0.00011            | 83    | 67/148/66        |
| SUGP1                     | rs2905326        | chr19:19  | 88        | G/T     | -0.00062    | 0.079             | 0.25         | 0.00011            | 35    | 18/60/16         |
| TAOK2                     | rs12691307       | chr16:30  | -55       | A/G     | 0.001       | -0.03             | 0.81         | 0.00045            | 240   | 60/80/57         |
| TCF20                     | rs6002655        | chr22:43  | -6        | C/T     | -0.012      | -0.1              | 0.13         | 0.0011             | 280   | 95/56/112        |
| TMEM110, TMEM110, TMEM110 | rs2535627        | chr3:33   | -23       | T/C     | -0.012      | 0.11              | 0.05         | 0.0013             | 2.8   | 9/18/10          |
| MUSTN1, TMEM110, MUSTN1   | rs140505938      | chr1:150  | -8        | C/T     | 0.056       | 0.062             | 0.0018       | 0.0037             | 5.2   | 18/39/21         |
| VPS45                     | rs1191419        | chr10:105 | 38        | T/A     | -0.002      | -0.034            | 0.63         | 0.00019            | 46    | 103/110/105      |
| WBP1L                     | chr5_140143664_1 | chr5:140  | 95        | D/U     | -0.0094     | -0.1              | 0.14         | 0.00019            | 9.6   | 31/26/11         |
| WDR55                     |                  |           |           |         |             |                   |              |                    |       |                  |

Table S1-3: For DLPPC, similar to Table 1 in the main manuscript, but for individual txSNPs that were FDR5% signif cant

| Gene                      | RisksNP         | Pos       | Dist (Kb) | Ref/Alt | aeQTL (est) | aeQTL txSNP (est) | aeQTL (pval) | aeQTL txSNP (pval) | Reads | Genomgroup (ind) |
|---------------------------|-----------------|-----------|-----------|---------|-------------|-------------------|--------------|--------------------|-------|------------------|
| AS3MT, BORCS7             | rs55833108      | chr10:105 | 118       | G/T     | -0.032      | -0.13             | 0.14         | 0.0027             | 35    | 10/95/9          |
| ATXN7                     | rs832187        | chr3:64   | -155      | C/T     | -0.004      | -0.082            | 0.69         | 0.00156            | 54    | 40/45/27         |
| BAG5                      | rs12887734      | chr14:104 | 23        | G/T     | 0.013       | 0.077             | 0.3          | 0.0017             | 46    | 21/73/25         |
| CTNND1, TMX2, C11orf31    | rs9420          | chr11:58  | -19       | A/G     | 0.0083      | 0.088             | 0.28         | 3e-04              | 210   | 29/64/19         |
| DFNA5                     | chr7_24747494_D | chr7:25   | 9         | I/D     | -0.056      | -0.089            | 0.029        | 0.0026             | 39    | 22/43/18         |
| FAM53C                    | rs10043984      | chr5:138  | 27        | C/T     | 0.022       | 0.077             | 0.056        | 0.0014             | 37    | 27/74/21         |
| HAPLN4                    | rs2905426       | chr19:19  | 111       | G/T     | 0.038       | 0.093             | 0.022        | 0.0021             | 39    | 20/45/24         |
| HSPA9, SNORD63            | rs10043984      | chr5:138  | -190      | C/T     | 0.0047      | 0.042             | 0.42         | 2.9e-05            | 4800  | 33/88/29         |
| HSPA9, SNORD63            | rs3849046       | chr5:138  | -51       | C/T     | 0.0022      | 0.031             | 0.68         | 0.0066             | 4800  | 48/55/47         |
| HSPA9, SNORD63            | rs12887734      | chr14:104 | -49       | G/T     | -0.0028     | -0.022            | 0.68         | 0.0066             | 380   | 61/52/60         |
| KLC1                      | rs12826178      | chr12:58  | 33        | G/T     | 0.02        | 0.17              | 0.22         | 0.0085             | 27    | 7/53/10          |
| LRP1                      | rs11210892      | chr1:44   | 13        | G/A     | 0.011       | -0.073            | 0.9          | 0.0016             | 110   | 5/180/5          |
| PTRF                      | rs11210892      | chr1:44   | 13        | G/A     | 0.011       | -0.073            | 0.9          | 0.0016             | 160   | 57/163/60        |
| REFF                      | rs10803138      | chr1:8    | 12        | U/D     | 0.0049      | -0.053            | 0.55         | 0.0012             | 68    | 42/21/55         |
| SDCCAG8, MIR4677          | rs10803138      | chr1:244  | 61        | A/G     | -0.042      | -0.11             | 0.0032       | 0.0071             | 760   | 24/30/26         |
| SEPT3                     | rs1023500       | chr22:42  | -52       | T/C     | 0.003       | 0.067             | 0.65         | 0.0027             | 190   | 7/51/10          |
| SF3B1                     | rs6434928       | chr2:198  | 47        | G/A     | -0.0083     | -0.027            | 0.13         | 0.0015             | 170   | 71/1/70          |
| SOX2, SOX2-OT             | rs9841616       | chr3:181  | -291      | T/A     | -0.007      | 0.24              | 0.45         | 0.0012             | 89    | 5/12/7           |
| SREBF2, MIR33A            | rs1023500       | chr22:42  | 64        | T/C     | -0.0057     | -0.11             | 0.95         | 0.0038             | 2900  | 14/53/15         |
| STAT6                     | rs324017        | chr12:57  | -2        | A/C     | -0.028      | -0.055            | 0.038        | 0.0026             | 19    | 36/5/36          |
| TMEM110, TMEM110, TMEM110 | rs2535627       | chr3:33   | -27       | T/C     | -0.0055     | -0.12             | 0.64         | 0.0016             | 13    | 14/27/19         |
| MUSTN1, TMEM110, MUSTN1   |                 |           |           |         |             |                   |              |                    |       |                  |
| TOM1L2                    | rs8082590       | chr17:18  | 210       | G/A     | -0.011      | -0.043            | 0.026        | 0.0018             | 66    | 68/43/74         |

Table S1-4: For Hippocampus, similar to Table 1 in the main manuscript, but for individual txSNPs that were FDR5% signif cant

| Gene                       | SNP              | Pos       | Dist (Kb) | Dist Rank | Ref/Alt | Direction | aeQTL p-value | txSNPReads | Individuals per group | Support                       |
|----------------------------|------------------|-----------|-----------|-----------|---------|-----------|---------------|------------|-----------------------|-------------------------------|
| AS3MT, BORCS7              | rs1191419        | chr10:105 | -2        | 1         | T/A     | up        | 3.1e-21       | 20         | 150                   | 59/41/152 Ge, Ga, Re, Je, Js  |
| PROPT1                     | rs12887734       | chr14:104 | 58        | 1         | C/T     | down      | 4e-22         | 8          | 6300                  | 129/64/16 Ge, Ga, Je, Js      |
| ZMAT2                      | chr5_140143664_I | chr5:140  | 58        | 2         | D/H     | down      | 4e-22         | 9          | 230                   | 162/36/143 Ga                 |
| HAPLN4                     | rs2905426        | chr19:19  | 109       | 5         | G/T     | down      | 5.8e-19       | 12         | 230                   | 103/163/106 Ga                |
| BRINP2                     | rs723273         | chr12:08  | 8         | 1         | A/G     | up        | 5.4e-17       | 9          | 230                   | 147/21/126 Ge, Ga, Je, Js     |
| NDUFA2                     | rs6070165        | chr11:17  | 29        | 1         | A/G     | down      | 3e-12         | 4          | 1000                  | 84/272/93 Ga, Js              |
| TOM1L2                     | chr5_140143664_I | chr5:140  | 116       | 8         | D/H     | down      | 3e-12         | 2          | 77                    | 134/85/107 Ga, Re             |
| FURIN                      | rs8025390        | chr17:18  | 186       | 8         | G/A     | down      | 5.3e-12       | 24         | 360                   | 140/154/162 Ga, Js            |
| ANP32E                     | rs14702          | chr15:91  | 0         | 1         | G/A     | down      | 4.4e-10       | 8          | 680                   | 142/226/144 Ga, Fe            |
| SFC51                      | rs12887734       | chr14:104 | -160      | 8         | C/T     | down      | 7.7e-09       | 3          | 8900                  | 70/268/71 Ga                  |
| SNX19                      | rs12887734       | chr14:104 | 59        | 4         | C/T     | down      | 8e-09         | 3          | 240                   | 120/135/104 Ga                |
| PTPRF                      | rs2535627        | chr5:53   | 103       | 6         | T/C     | down      | 1.6e-08       | 44         | 710                   | 160/319/145 Ga, Je, Js        |
| NEK4                       | rs10791097       | chr11:131 | -28       | 1         | T/C     | up        | 2.3e-07       | 17         | 1600                  | 140/311/131 Ga                |
| FAM57B                     | rs2535627        | chr14:104 | 59        | 4         | T/C     | down      | 4.8e-07       | 9          | 44                    | 140/170/141 Ga, Je, Js        |
| LRP1                       | rs126913007      | chr16:30  | -96       | 12        | A/G     | down      | 6.6e-07       | 4          | 370                   | 139/167/152 Ga, Js            |
| HSPD1                      | rs12826178       | chr12:58  | 16        | 4         | G/T     | down      | 5.9e-06       | 32         | 150                   | 25/455/23 Ga                  |
| VPS45                      | rs6434928        | chr2:198  | -47       | 3         | G/A     | down      | 3.9e-05       | 9          | 51                    | 127/149/119 Ga                |
| PRMT7                      | rs140505938      | chr1:150  | -8        | 1         | C/T     | down      | 4e-05         | 5          | 120                   | 20/90/24 Ga, Js               |
| ZFYVE21                    | rs12887734       | chr14:104 | -146      | 7         | G/T     | down      | 0.00027       | 9          | 520                   | 86/288/103 Ge, Ga, Re, Je, Js |
| FAM53C                     | rs10043984       | chr5:138  | 27        | 2         | C/T     | down      | 0.00034       | 7          | 420                   | 118/255/103 Ga                |
| AS3MT, BORCS7              | rs5833108        | chr10:105 | 80        | 2         | G/T     | down      | 0.00035       | 9          | 100                   | 104/260/89 Ga, Js             |
| IK, MIR3635                | chr5_140143664_I | chr5:140  | 102       | 7         | D/H     | down      | 6e-04         | 20         | 150                   | 39/369/44 Ge, Ga              |
| SNL3                       | rs2535627        | chr5:53   | 117       | 8         | T/C     | down      | 0.00066       | 5          | 160                   | 96/130/81 Ga                  |
| SNORD19, SNORD69, SNORD19B | rs12887734       | chr14:104 | -153      | 8         | G/T     | up        | 7e-04         | 9          | 410                   | 153/167/144 Re                |
| PPP1R13B                   | rs12887734       | chr14:104 | 43        | 1         | C/T     | down      | 0.001         | 9          | 42                    | 43/119/39 Ga                  |
| RIMS1                      | rs1339227        | chr6:73   | 43        | 1         | C/T     | down      | 0.0012        | 21         | 420                   | 130/365/108 Ga                |
| DNAJC19                    | chr3_180594593_I | chr3:181  | -107      | 2         | D/H     | up        | 0.0014        | 2          | 54                    | 126/19/132 Ga                 |
| CDIPT                      | rs126913007      | chr16:30  | 66        | 7         | A/G     | down      | 0.0016        | 3          | 31                    | 27/63/24 Ga                   |
| GATA2A                     | rs2905426        | chr19:19  | -98       | 4         | G/T     | down      | 0.0016        | 15         | 85                    | 135/162/144 Ga, Je, Js        |
| CUL3                       | rs11685299       | chr2:225  | 0         | 1         | C/A     | up        | 0.0018        | 24         | 820                   | 96/217/96 Ga, Re              |
| NSUN6                      | rs7893279        | chr10:19  | -90       | 2         | T/G     | up        | 0.0023        | 2          | 23                    | 39/241/31 Ga, Js              |

Table S1-3: For DLFFC, similar to Table 1 in the main manuscript, but here all fetal samples were used

| Gene          | SNP              | Pos       | Dist (Kb) | Dist Rank | Ref/Alt | Direction | aeQTL p-value | txSNPReads | Individuals per group | Support                     |
|---------------|------------------|-----------|-----------|-----------|---------|-----------|---------------|------------|-----------------------|-----------------------------|
| AS3MT, BORCS7 | rs1191419        | chr10:105 | -2        | 1         | T/A     | up        | 2.2e-08       | 20         | 120                   | 90/88/88 Ge, Ga, Re, Je, Js |
| ZMAT2         | chr5_140143664_I | chr5:140  | 58        | 2         | D/H     | down      | 3.9e-09       | 2          | 180                   | 97/34/78 Ga                 |
| SNX19         | rs10791097       | chr11:131 | -28       | 1         | T/G     | up        | 2e-07         | 44         | 970                   | 98/212/90 Ga, Je, Js        |
| HSPD1         | rs6434928        | chr2:198  | -47       | 3         | G/A     | down      | 6.3e-06       | 6          | 380                   | 77/157/71 Ga, Js            |
| DNAJC19       | chr3_180594593_I | chr3:181  | -107      | 2         | D/H     | up        | 0.0015        | 2          | 37                    | 79/21/64 Ga                 |
| SDCCAG8       | rs10803138       | chr12:44  | 0         | 1         | A/G     | down      | 0.0022        | 4          | 730                   | 54/148/54 Ga                |

Table S1-6: For Hippocampus, similar to Table 1 in the main manuscript, but here all fetal samples were used
